## LETTER TO THE EDITOR

### Perifascicular necrosis in anti-synthetase syndrome beyond anti-Jo-1

Akinori Uruha,<sup>1,2</sup> Shigeaki Suzuki,<sup>3</sup> Norihiro Suzuki<sup>3</sup> and Ichizo Nishino<sup>1,2</sup>

1 Department of Genome Medicine Development, Medical Genome Center, National Center of Neurology and Psychiatry (NCNP), 4-1-1 Ogawahigashi-cho, Kodaira, Tokyo 187-8551, Japan

2 Department of Neuromuscular Research, National Institute of Neuroscience, NCNP, 4-1-1 Ogawahigashi-cho, Kodaira, Tokyo 187-8502, Japan

3 Department of Neurology, Keio University School of Medicine, 35 Shinanomachi, Shinjuku-ku, Tokyo 160-8582, Japan

Correspondence to: Ichizo Nishino,  
Department of Neuromuscular Research, National Institute of Neuroscience,  
NCNP, 4-1-1 Ogawahigashi-cho, Kodaira, Tokyo 187-8502, Japan  
E-mail: nishino@ncnp.go.jp

Sir,

The papers by Mescam-Mancini *et al.* (2015) and Stenzel *et al.* (2015) are of particular interest, at least partially addressing the important question whether anti-synthetase syndrome is pathologically distinct from other idiopathic inflammatory myopathies. Mescam-Mancini *et al.* (2015) beautifully demonstrated that patients with anti-Jo-1 antibodies, one of the anti-aminoacyl-tRNA synthetase (ARS) antibodies, characteristically show perifascicular necrosis on muscle pathology. However, they did not deal with anti-synthetase syndrome patients with anti-ARS antibodies other than anti-Jo-1, raising a question whether perifascicular necrosis is characteristic only of myopathies associated with anti-Jo-1 antibodies or is observed also in those associated with other anti-ARS antibodies. We have analysed muscle samples from patients with anti-Jo-1 antibodies ( $n = 15$ ) and non-Jo-1 anti-ARS antibodies ( $n = 35$ ), based on the criteria described in the paper. As small regenerating fibres grouped in the perifascicular area could mimic perifascicular atrophy, we excluded type 2C fibres in judgement of perifascicular atrophy. The antibodies were evaluated by means of RNA immunoprecipitation assay, which is a superior detection method for the antibodies in terms of sensitivity and specificity (Suzuki *et al.*, 2014). Frequencies of patients who showed myofibre necrosis and atrophy, respectively in perifascicular regions were similar among patients with anti-Jo-1, anti-OJ, and anti-PL-7 antibodies (Fig. 1 and Table 1). These data indicate the presence of the same pathological features in anti-Jo-1, anti-OJ,

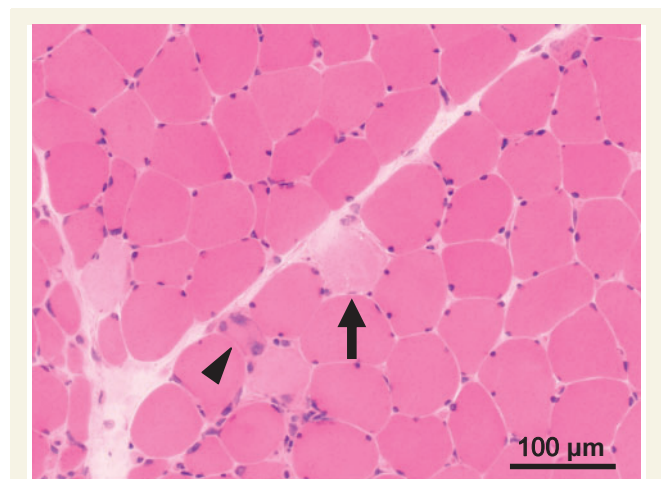

**Figure 1** Perifascicular necrosis of a patient with anti-OJ antibodies. Necrotic (arrow) and regenerating (arrowhead) fibres are preferentially located in the peripheral regions of the muscle fascicles.

and anti-PL-7 myopathies. Albeit small series, some patients with anti-EJ or anti-KS antibodies also showed perifascicular necrosis without perifascicular atrophy, raising a possibility that anti-EJ and anti-KS myopathies may also show the pathological phenotype similar to anti-Jo-1 myopathy. In contrast, muscle pathology of all four patients with anti-PL-12 antibodies had no or few necrotic and regenerating fibres, naturally not showing perifascicular necrosis. Also these patients' muscle symptoms were milder with Medical Research Council grades 4 or greater and

**Table 1** Perifascicular necrosis and atrophy

|                                             | Jo-1<br>(n = 15) | OJ<br>(n = 13) | PL-7<br>(n = 12) | EJ<br>(n = 5) | KS<br>(n = 1) | PL-12<br>(n = 4) |
|---------------------------------------------|------------------|----------------|------------------|---------------|---------------|------------------|
| Myofibre necrosis in perifascicular regions | 7<br>(47%)       | 6<br>(46%)     | 8<br>(67%)       | 3             | 1             | 0                |
| Myofibre atrophy in perifascicular regions  | 3<br>(20%)       | 3<br>(23%)     | 2<br>(17%)       | 0             | 0             | 0                |

There are no statistically significant differences among patients with anti-Jo-1, -OJ, or -PL-7 antibodies ( $P = 0.50$  and  $0.92$ , respectively. Chi-square test).

serum creatine kinase levels less than twice the upper limit of normal. This may indicate the exceptional nature of anti-PL-12 antibodies, in line with the previous reports showing less frequent and milder skeletal muscle involvement in anti-PL-12 patients (Hervier *et al.*, 2010; Hamaguchi *et al.*, 2013), although they are inconclusive due to the limited sample number. We need further studies regarding this point.

Our data suggest that perifascicular necrosis is a pathological feature not only in anti-Jo-1 myopathy but also in anti-synthetase syndrome associated with other anti-ARS antibodies, at least anti-OJ and -PL-7.

## Acknowledgement

The authors thank Ms Kaoru Tatezawa (Department of Neuromuscular Research, National Institute of Neuroscience, National Centre of Neurology and Psychiatry) for her excellent technical support.

## Funding

This study was supported by JSPS KAKENHI Grant Number (25461323 and 26293214); Intramural Research Grant (26-8 and 23-5) for Neurological and Psychiatric Disorders of NCNP; a Grant for Research on Intractable Diseases and Comprehensive Research on Disability Health and Welfare from the Ministry of Health, Labour and Welfare of Japan; a Grant of the Japanese Ministry of

Education, Science, Sports and Culture (26461298); a Health and Labour Sciences Research Grant on Rare and Intractable Diseases (Evidence-based Early Diagnosis and Treatment Strategies for Neuroimmunological Diseases) from the Ministry of Health, Labour and Welfare of Japan; a Grant-in-Aid for Scientific Research (B) from MEXT (24390227); and a Grant-in-Aid for Challenging Exploratory Research (24659437).

## References

- Hamaguchi Y, Fujimoto M, Matsushita T, Kaji K, Komura K, Hasegawa M, et al. Common and distinct clinical features in adult patients with anti-aminoacyl-tRNA synthetase antibodies: heterogeneity within the syndrome. *PLoS One* 2013; 8: e60442.
- Hervier B, Wallaert B, Hachulla E, Adoue D, Lauque D, Audrain M, et al. Clinical manifestations of anti-synthetase syndrome positive for anti-alanyl-tRNA synthetase (anti-PL12) antibodies: a retrospective study of 17 cases. *Rheumatology* 2010; 49: 972–6.
- Mescam-Mancini L, Allenbach Y, Hervier B, Devilliers H, Mariampillay K, Dubourg O, et al. Anti-Jo-1 antibody-positive patients show a characteristic necrotizing perifascicular myositis. *Brain* 2015; 138: 2485–92.
- Stenzel W, Preuße C, Allenbach Y, Pehl D, Junckerstorff R, Heppner FL, et al. Nuclear actin aggregation is a hallmark of anti-synthetase syndrome-induced dysimmune myopathy. *Neurol* 2015; 84: 1346–54.
- Suzuki S, Yonekawa T, Kuwana M, Hayashi YK, Okazaki Y, Kawaguchi Y, et al. Clinical and histological findings associated with autoantibodies detected by RNA immunoprecipitation in inflammatory myopathies. *J Neuroimmunol* 2014; 274: 201–8.
